# Supplementary material for: Ferrous–sucrose complex supplementation regulates maternal plasma metabolism and the fecal microbiota composition and improves neonatal immunity and placental glucose transportation by activating the EGF/PI3K/AKT signaling pathways in sows
Source: Royal Society of Chemistry journal article supplement (doi:10.1039/d3fo03733a), 2023-12-12

Supplementary Table 1. The ingredients and nutrient level of the basal diet in sows from late gestation to parturition

| Composition                | Content (%) |
|----------------------------|-------------|
| Corn                       | 65          |
| Soybean meal (46% CP)      | 11.2        |
| soybean hulls              | 6           |
| extruded soybean           | 5           |
| extruded flaxseed          | 2           |
| fish meal                  | 5           |
| soybean oil                | 1           |
| L-lysine HCl (70%)         | 0.23        |
| CaHPO <sub>4</sub> (16.5%) | 1.2         |
| NaCl                       | 0.4         |
| L-threonine (98.5%)        | 0.12        |
| Tryptophan                 | 0.05        |
| DL-methionine (98.5%)      | 0.06        |
| Limestone                  | 1           |
| Tryptophan (25%)           | 0.05        |
| Choline chloride           | 0.14        |
| Valine (85%)               | 0.12        |
| NaHCO <sub>3</sub>         | 0.18        |
| Premix <sup>a</sup>        | 1           |
| yeast hydrolysate          | 0.25        |
| Nutrient levels            | Content (%) |
| Crude protein              | 13.10       |
| Digestible energy, MJ/kg   | 12.58       |
| Crude fibre                | 4.5         |
| SID Lys                    | 0.91        |

<sup>a</sup> The vitamin–mineral premix provided the following per kilogram of diets: antioxidant 100 mg, sweetening agent 200 mg, 4000 IU of vitamin A, 800 IU of vitamin D3, 44 IU of vitamin E, 0.5 mg of vitamin K3, 0.2 mg of biotin, 1250 mg of choline chloride, 1.3 mg of folic acid, 10.0 mg of niacin, 12.0 mg of pantothenic acid, 3.75 mg of riboflavin, 6.0 mg of riboflavin, 15 mg of vitamin B6, 14 mg of Cu as CuSO<sub>4</sub>·5H<sub>2</sub>O, 0.2 mg of I as KI, 40 mg of Mn as MnSO<sub>4</sub>·H<sub>2</sub>O, 40 mg of Zn as ZnSO<sub>4</sub>·H<sub>2</sub>O, 0.20 mg of Se as Na<sub>2</sub>SeO<sub>3</sub>.

Supplementary Table 2. Primers used for gene expression analysis

| Assay        | Nucleotide sequence of primers (5'-3') | Accession No.  |
|--------------|----------------------------------------|----------------|
| <i>GAPDH</i> | F: TGGTGAAGGTCGGAGTGAAC                | NM_001206359.1 |
|              | R: TGTAGTGGAGGTCAATGAAGGG              |                |
| <i>CCL24</i> | F: AAATTCCCGAGAGCCGAGTG                | XM_021085920.1 |
|              | R: ATCGCCCTGATCCTAGTGGA                |                |
| <i>IL-10</i> | F: TCCGACTCAACGAAGAAGGC                | NM_214041.1    |
|              | R: AACTCTTCACTGGGCCGAAG                |                |
| <i>CCR10</i> | F: GCCATTTCGGGCCTTACTC                 | NM_001044563.1 |
|              | R: AGCGATAACAGCCACACGAC                |                |
| <i>IL-5</i>  | F: TGCTTCTGCATTTGAGTTTGCT              | NM_214205.1    |
|              | R: TCGCCTATCAGCAGAGTTTCG               |                |

Supplementary figure 1.

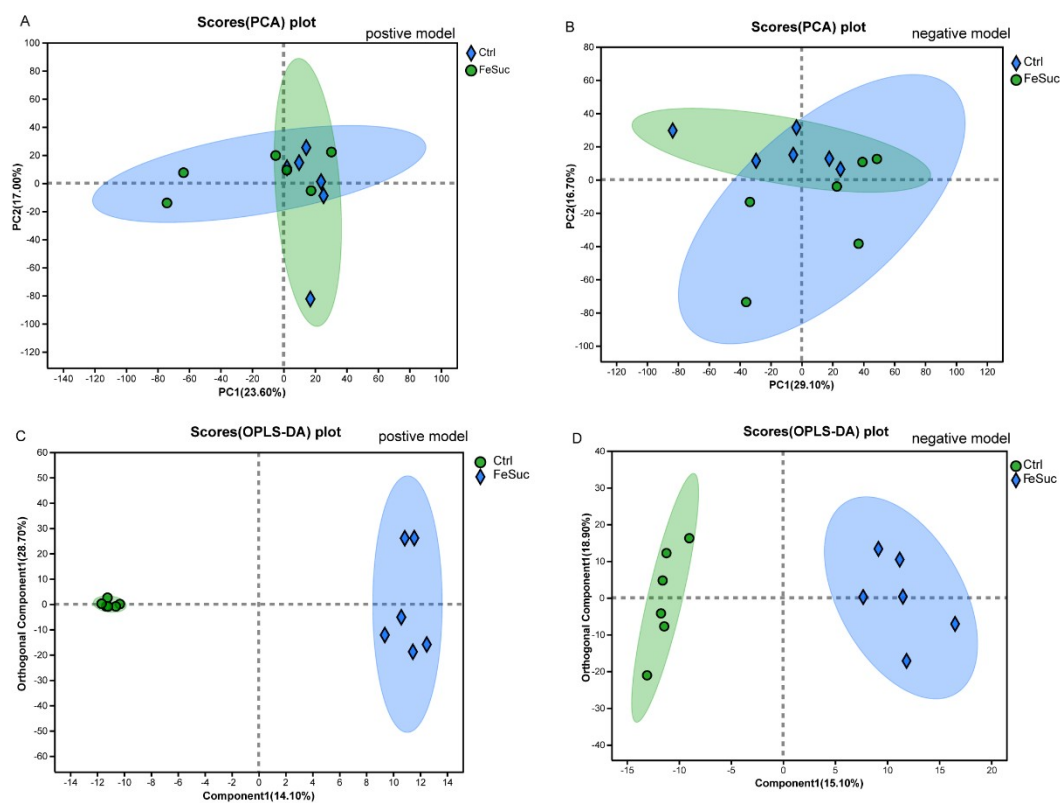

PCA and OPLS-DA analysis between FeSur and Ctrl group in the positive and negative model for the comparison of the metabolic changes.

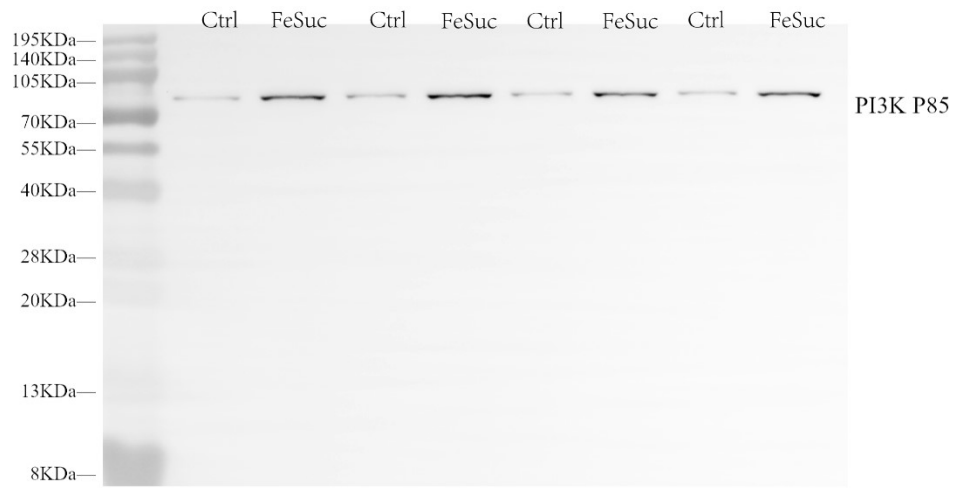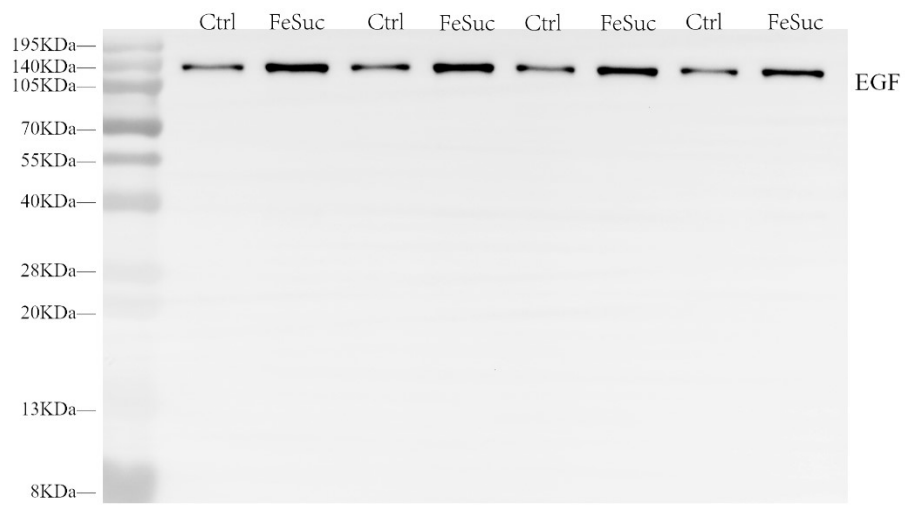

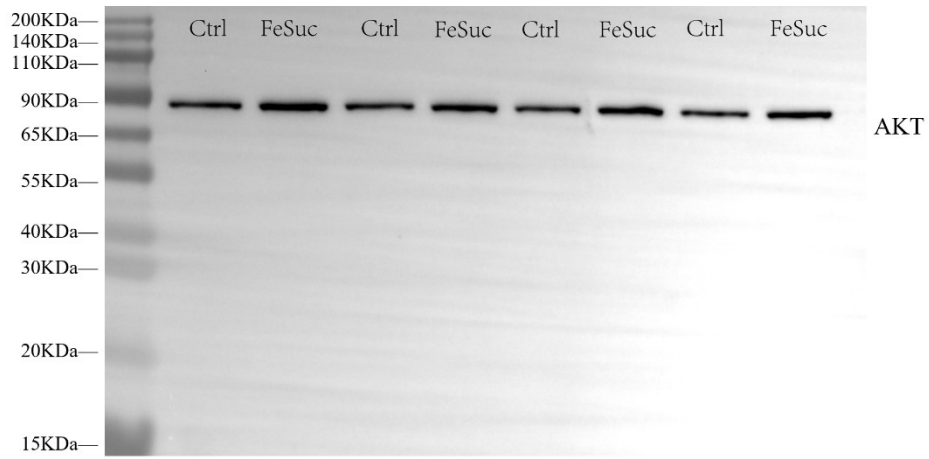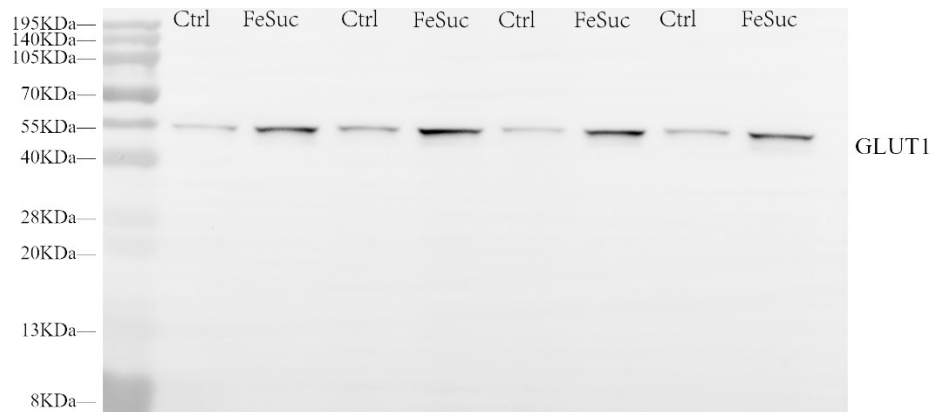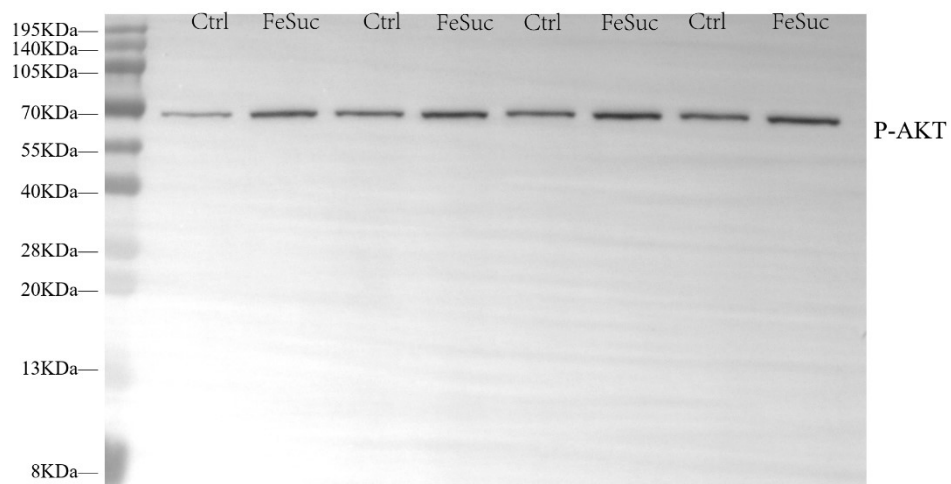

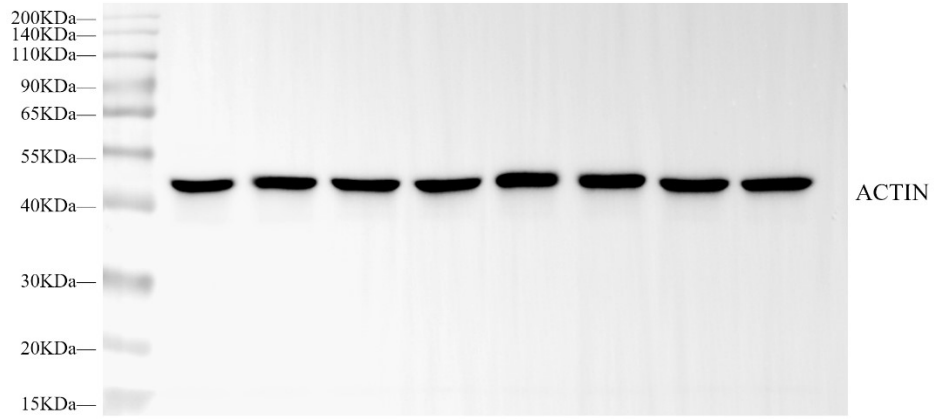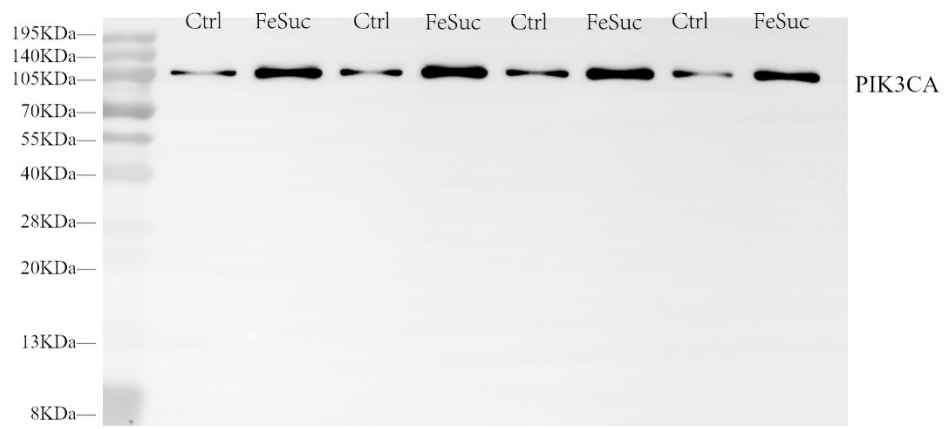

Supplement: d3fo03733a1.pdf [file d3fo03733a1.pdf]
